# Supplementary material
Source: Springer Nature journal article supplement (https://www.springermedizin.de/resource/supplementary/13024_2012_370_MOESM15_ESM.pdf/9643840)

V5

EWS

DAPI

Merged

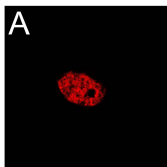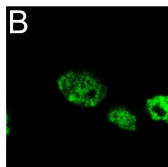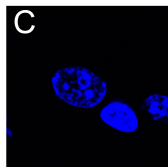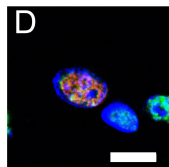FUS<sub>WT</sub>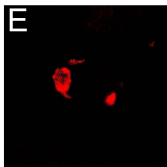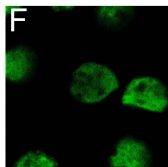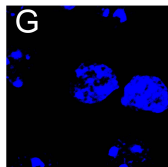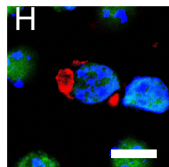FUS <sub>$\Delta$ 14</sub>

V5

TAF15

DAPI

Merged

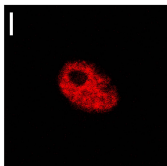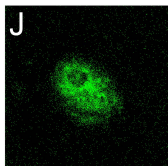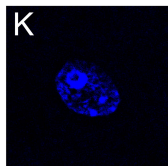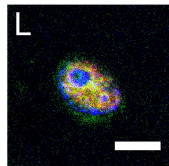FUS<sub>WT</sub>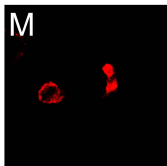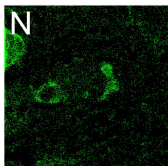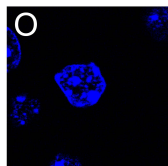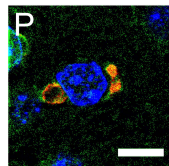FUS <sub>$\Delta$ 14</sub>

Supplement: MOESM15 [file 9643840]
